# Supplementary material for: Quantification analysis of protein and mycelium contents upon inhibition of melanin for Aspergillus niger: a study of matrix assisted laser desorption/ionization mass spectrometry (MALDI-MS)
Source: Royal Society of Chemistry journal article supplement (doi:10.1039/c7ra03741d), 2017-01-01
Supplement: c7ra03741d1.pdf [file c7ra03741d1.pdf]

## Figure S1

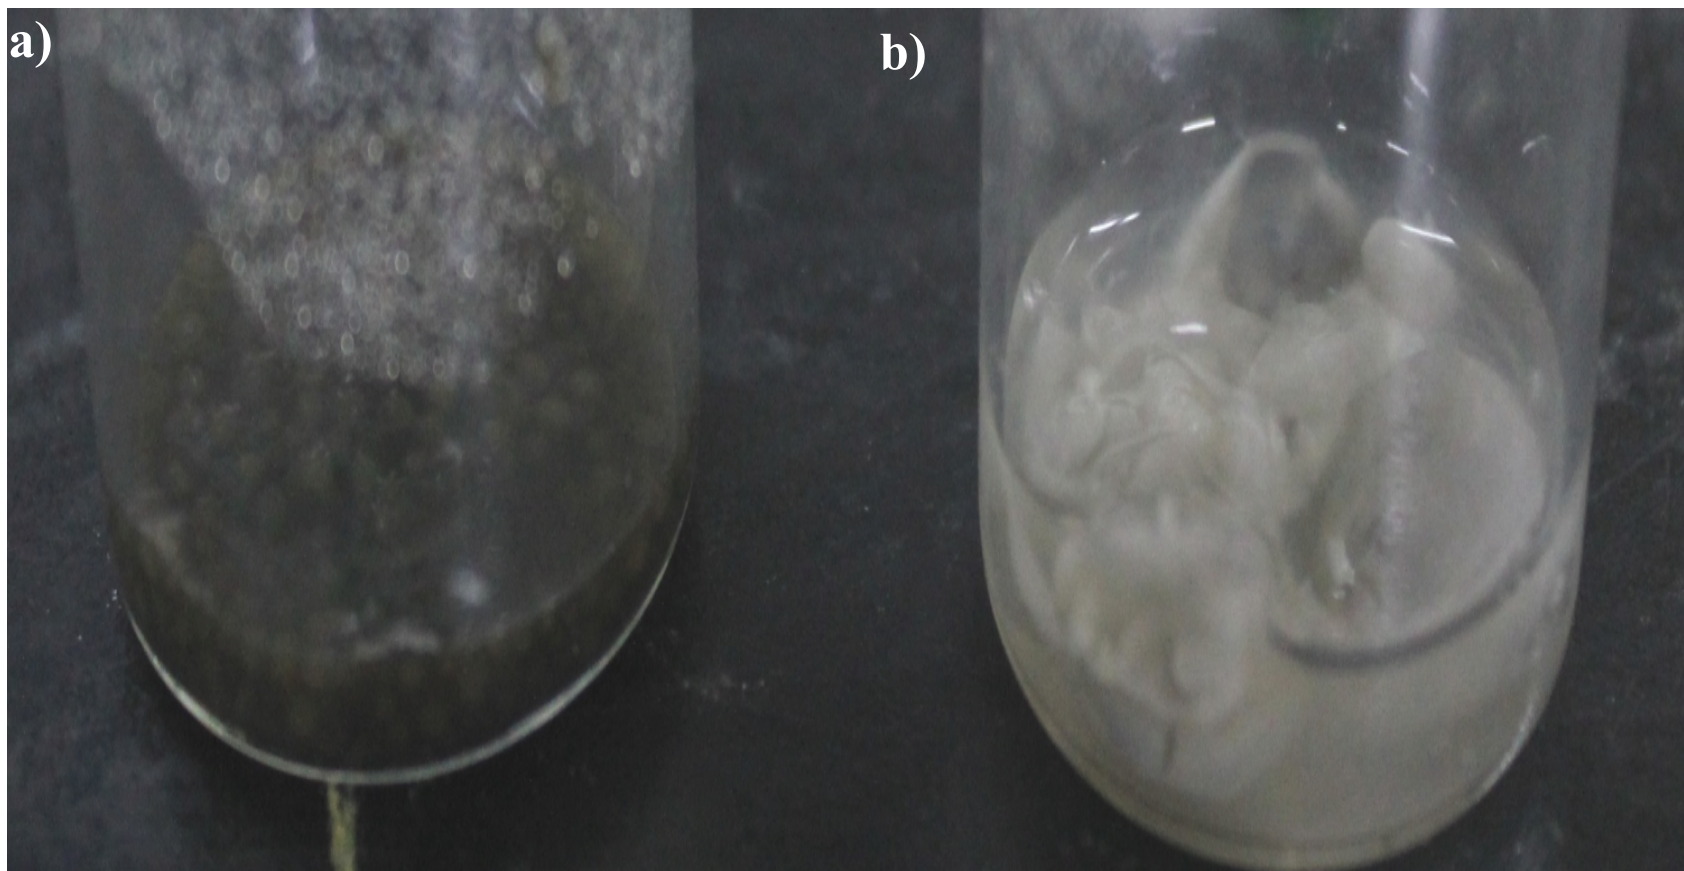

**Figure S1.** Mycelium of *A. niger* BCRC 30402 grown in liquid culture (a) Without tricyclazole (b) With tricyclazole. Image is for Scintillation Vials (20 mL).
